# Supplementary material
Source: publisher figshare collection journal article supplement (https://karger.figshare.com/ndownloader/files/14859971)
Supplement: Supplementary file 1 [file 14859971]

**Fig. S4.** Negative antibodies to *A. annua* pollen.

**a** and **b**: two mAbs derived from *A. annua* pollen extract reactive to Art an 1 and Art an 3 by ELISA and Western blot, but no red signal for localization. **c** and **d**: mAbs to peach Pru p 3 and human actin.
